# Supplementary material for: Twisted growth of organic crystal in a polymer matrix: sigmoidal and helical morphologies of pyrene
Source: Royal Society of Chemistry journal article supplement (doi:10.1039/c2ce26079d), 2012-01-01
Supplement: c2ce26079d.pdf [file c2ce26079d.pdf]

## Electronic Supplementary Information (ESI)

### Twisted Growth of Organic Crystal in Polymer Matrix: Sigmoidal and Helical Morphologies of Pyrene

Soichiro Ibe, Ryuta Ise, Yuya Oaki, and Hiroaki Imai\*

Department of Applied Chemistry, Faculty of Science and Technology, Keio University, 3-14-1 Hiyoshi, Kohoku-ku, Yokohama 223-8522 (Japan)

E-mail: hiroaki@aplc.keio.ac.jp

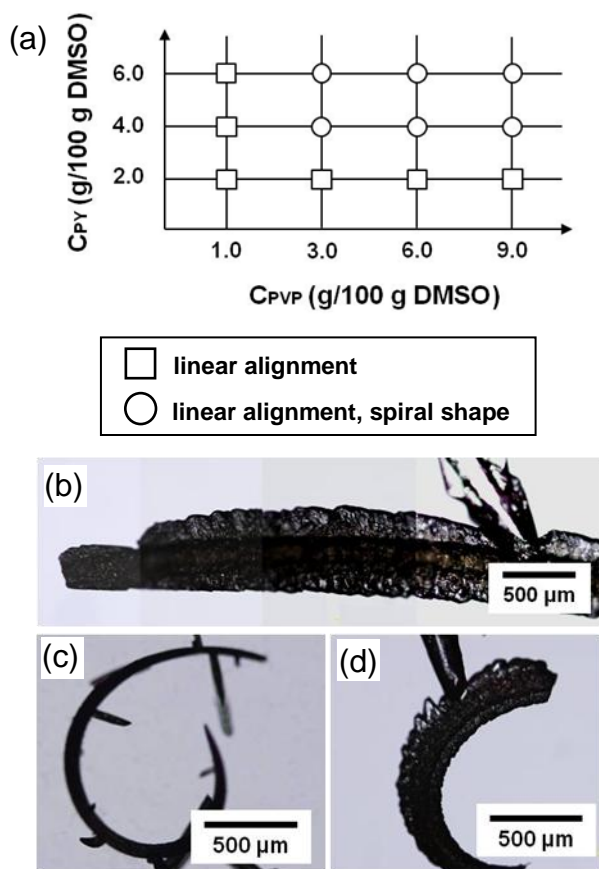

**Figure S1.** Morphological variation (a) and optical micrographs (b-d) of pyrene crystals prepared with Method 2. Linear alignment at  $C_{PY}/C_{PVP} = 4.0/9.0$  (b) and spiral shapes at  $C_{PY}/C_{PVP} = 4.0/4.0$  (c) and  $4.0/9.0$  (d).

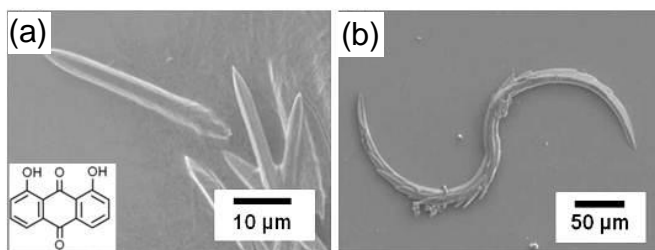

**Figure S2.** SEM images of morphologies of chrysazin crystals with an increase in  $C_{PVP}$ . Rods at  $C_{chrysazin}/C_{PVP} = 0.5/0.2$  (a) and sigmoidal shape at  $C_{chrysazin}/C_{PVP} = 0.5/0.5$  (b). Inset in (a) shows the molecular structure of chrysazin.

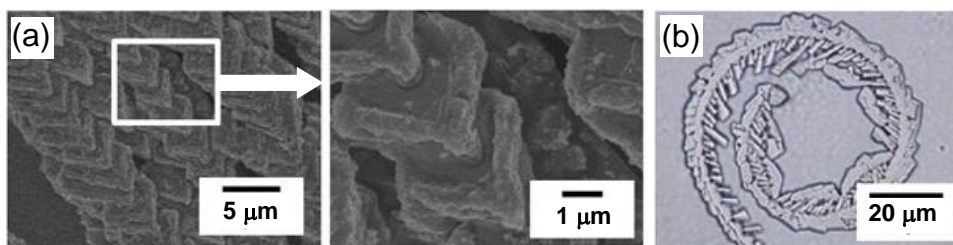

**Figure S3.** SEM and optical microscope images of morphologies of pyrene crystals grown in chloroform with polystyrene (PS). Linear alignments of lozenge units at  $C_{PY}/C_{PS} = 1.0/0.5$  (a) and a curving shape at  $C_{PY}/C_{PS} = 1.5/1.5$  (b).
